# Supplementary material for: Quasi-intrinsic fluorescent probes for detecting the DNA adduct (ABPdG) based on an excited-state intermolecular charge transfer mechanism
Source: Royal Society of Chemistry journal article supplement (doi:10.1039/d2cp03513h), 2023-01-01
Supplement: d2cp03513h1.pdf [file d2cp03513h1.pdf]

## Supporting Information

### **Quasi-intrinsic fluorescent probes for detecting DNA adduct (<sup>ABP</sup>dG) based on excited-state intermolecular charge transfer mechanism**

Lingjie Duan, Xiao Zhang, Yu Zhao, Qingtian Meng\*, Changzhe Zhang\*

*School of Physics and Electronics, Shandong Normal University, Jinan 250358, China*

#### **Contents:**

1. The structural and photophysical properties of C and C-analogues: Figs. S1-S3, and Tables S1-S3.
2. The structural and photophysical properties of base pairs in water: Figs. S4-S6, Tables S4-S6, and SI-I.
4. The photophysical properties of monomers and base pairs determined by PBE0-D3, wB97XD and CAM-B3LYP functional: Figs. S7-S8.
5. The photophysical properties of monomers and base pairs in continuum with a low dielectric constant ( $\epsilon \sim 4$ ): Figs. S9-S10.
6. The photophysical properties of monomers and base pairs after binding to deoxyribose: Fig. S11 and Tables S7-S8.

**Fig. S1.** FMOs involved in the absorption/emission processes of <sup>ABP</sup>G (left panel) and <sup>ABP</sup>G:C (right panel).

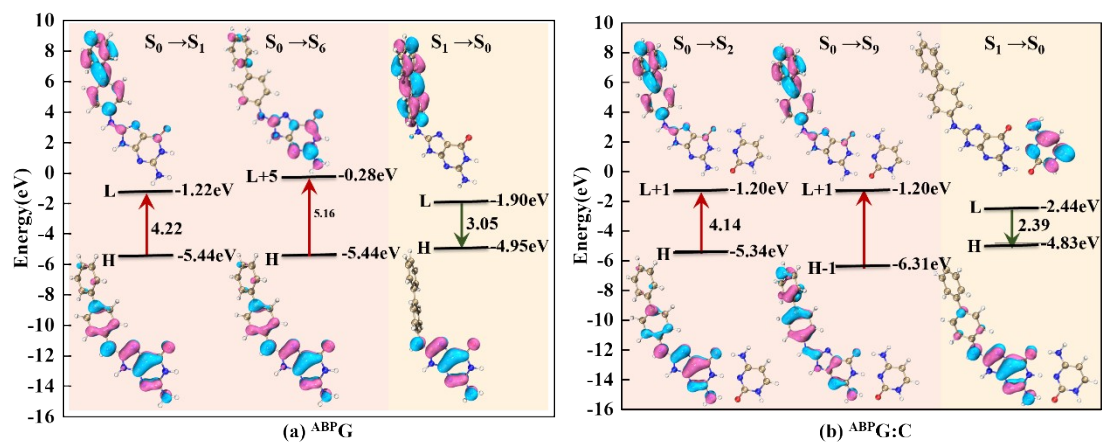

**Table S1.** Absorption/fluorescence wavelengths ( $\lambda$ ), corresponding oscillator strengths ( $f_{\text{abs.}}$  and  $f_{\text{flu.}}$ ), and state assignments for <sup>ABP</sup>G and <sup>ABP</sup>G:C.

| Optical spectral | Base               | Transition            | $\lambda$ (nm)        | $f_{\text{abs.}}/f_{\text{flu.}}$ | Assignment(CI/Type/Gap(eV))      |
|------------------|--------------------|-----------------------|-----------------------|-----------------------------------|----------------------------------|
| Absorption       | <sup>ABP</sup> G   | $S_0 \rightarrow S_1$ | 330                   | 0.85                              | H→L(98.2%/ $\pi\pi^*/4.22$ )     |
|                  |                    | $S_0 \rightarrow S_6$ | 266                   | 0.36                              | H→L+5(51.2%/ $\pi\pi^*/5.16$ )   |
|                  | <sup>ABP</sup> G:C | $S_0 \rightarrow S_2$ | 337                   | 0.79                              | H→L+1(98.2%/ $\pi\pi^*/4.14$ )   |
|                  |                    | $S_0 \rightarrow S_9$ | 265                   | 0.43                              | H-1→L+1(70.8%/ $\pi\pi^*/5.11$ ) |
| Fluorescence     | <sup>ABP</sup> G   | $S_1 \rightarrow S_0$ | 490                   | 0                                 | L→H(99.0%/ $\pi\pi^*/3.05$ )     |
|                  |                    | <sup>ABP</sup> G:C    | $S_1 \rightarrow S_0$ | 632                               | 0                                |

Fig. S2. Optimized structures of monomers.

**(a) C and C-analogues in  $S_0$  state**

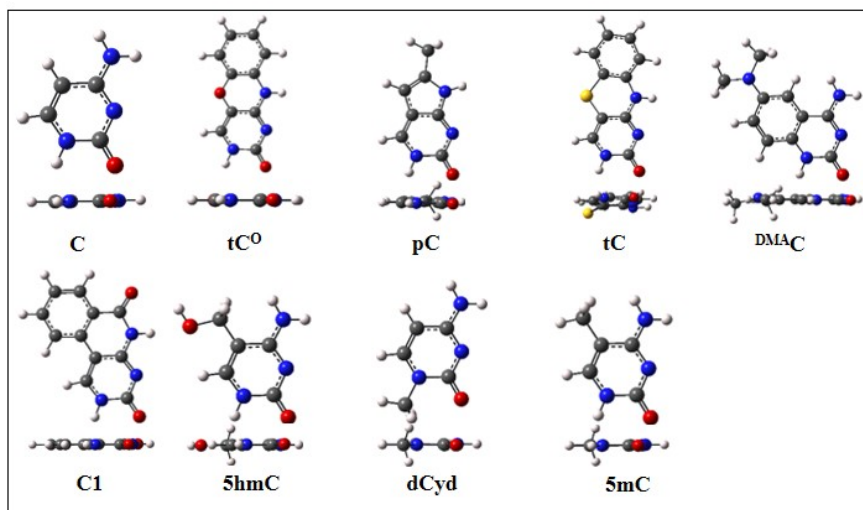

**(b) C and C-analogues in  $S_1$  state**

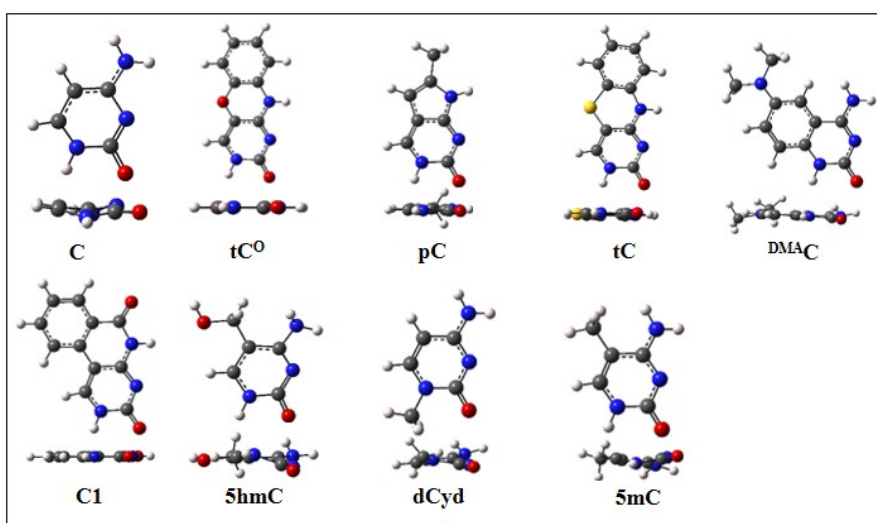

**Table S2.** The structure coordinates for monomers optimized with B3LYP-D3/6-311++G(d,p).

| <u>C (S<sub>0</sub>)</u> |          |          |          | <u>C (S<sub>1</sub>)</u> |          |          |          |
|--------------------------|----------|----------|----------|--------------------------|----------|----------|----------|
|                          | <u>X</u> | <u>Y</u> | <u>Z</u> |                          | <u>X</u> | <u>Y</u> | <u>Z</u> |
| C                        | -0.19921 | 1.70859  | 0.00016  | C                        | -0.29255 | 1.72881  | 0.08012  |
| C                        | 1.04948  | 1.18030  | -0.00020 | C                        | 1.01002  | 1.19065  | 0.11242  |
| C                        | 1.13881  | -0.25271 | -0.00023 | C                        | 1.17812  | -0.18480 | 0.00512  |
| C                        | -1.18037 | -0.51209 | 0.00004  | C                        | -1.11677 | -0.51956 | 0.00678  |
| H                        | -2.21708 | 1.27665  | 0.00044  | H                        | -2.25934 | 1.14953  | -0.40289 |
| H                        | -0.39464 | 2.77269  | 0.00048  | H                        | -0.53992 | 2.76995  | 0.20537  |
| H                        | 1.92809  | 1.80826  | -0.00056 | H                        | 1.86012  | 1.85292  | 0.22939  |
| N                        | 2.35086  | -0.84246 | -0.00355 | N                        | 2.38146  | -0.82554 | -0.21263 |
| H                        | 3.20195  | -0.30532 | 0.01319  | H                        | 3.21361  | -0.26510 | -0.08693 |
| H                        | 2.41331  | -1.84863 | 0.01024  | H                        | 2.45574  | -1.74414 | 0.20685  |
| N                        | 0.07016  | -1.04806 | 0.00006  | N                        | 0.07492  | -1.03843 | 0.19745  |
| N                        | -1.28298 | 0.89053  | 0.00023  | N                        | -1.31580 | 0.83711  | -0.21825 |
| O                        | -2.21878 | -1.18101 | 0.00004  | O                        | -2.17341 | -1.23320 | 0.03193  |

$tC^0(S_0)$ 

|    |   | X        | Y        | Z        |    |   | X        | Y        | Z        |
|----|---|----------|----------|----------|----|---|----------|----------|----------|
| 1  | C | 1.91557  | 1.59498  | 0.00024  | 12 | H | 3.97766  | 1.48966  | 0.00058  |
| 2  | C | 0.78118  | 0.85907  | -0.00015 | 13 | H | 1.91793  | 2.67570  | 0.00034  |
| 3  | C | 0.92727  | -0.56822 | -0.00010 | 14 | H | -0.11321 | -2.31843 | -0.00046 |
| 4  | C | 3.25425  | -0.43950 | 0.00019  | 15 | H | -4.94603 | 1.01853  | 0.00073  |
| 5  | C | -1.48191 | -0.72267 | -0.00025 | 16 | H | -4.79308 | -1.46673 | 0.00072  |
| 6  | C | -1.57893 | 0.67491  | -0.00024 | 17 | H | -2.57085 | -2.56854 | 0.00007  |
| 7  | C | -2.81636 | 1.29962  | 0.00011  | 18 | N | 3.12214  | 0.95149  | 0.00036  |
| 8  | H | -2.85379 | 2.38209  | 0.00009  | 19 | N | 2.09761  | -1.17529 | -0.00000 |
| 9  | C | -3.98028 | 0.52832  | 0.00046  | 20 | N | -0.20718 | -1.31148 | -0.00064 |
| 10 | C | -3.89434 | -0.86239 | 0.00046  | 21 | O | 4.37974  | -0.94311 | 0.00023  |
| 11 | C | -2.64694 | -1.48711 | 0.00008  | 22 | O | -0.45269 | 1.47719  | -0.00084 |

 $tC^0(S_1)$ 

|    |   | X        | Y        | Z        |    |   | X        | Y        | Z        |
|----|---|----------|----------|----------|----|---|----------|----------|----------|
| 1  | C | 1.90557  | 1.62735  | -0.00001 | 12 | H | 3.96885  | 1.48791  | 0.00009  |
| 2  | C | 0.78200  | 0.83096  | -0.00005 | 13 | H | 1.88496  | 2.70670  | 0.00012  |
| 3  | C | 0.92235  | -0.56416 | 0.00006  | 14 | H | -0.15407 | -2.34703 | -0.00014 |
| 4  | C | 3.23761  | -0.46693 | -0.00038 | 15 | H | -4.91819 | 1.07395  | 0.00027  |
| 5  | C | -1.47170 | -0.76535 | -0.00003 | 16 | H | -4.80742 | -1.41392 | 0.00005  |
| 6  | C | -1.55744 | 0.67516  | 0.00007  | 17 | H | -2.63524 | -2.58190 | -0.00014 |
| 7  | C | -2.79161 | 1.32373  | 0.00018  | 18 | N | 3.10268  | 0.96708  | -0.00002 |
| 8  | H | -2.80479 | 2.40637  | 0.00026  | 19 | N | 2.12374  | -1.21087 | -0.00012 |
| 9  | C | -3.95644 | 0.57801  | 0.00018  | 20 | N | -0.25273 | -1.33961 | -0.00011 |
| 10 | C | -3.88938 | -0.83924 | 0.00005  | 21 | O | 4.39906  | -0.90281 | 0.00014  |
| 11 | C | -2.68152 | -1.49967 | -0.00004 | 22 | O | -0.44238 | 1.44689  | -0.00000 |

**Table S3.** Absorption/fluorescence wavelengths ( $\lambda$ ) and corresponding oscillator strengths ( $f_{\text{abs.}}$  and  $f_{\text{flu.}}$ ) of monomers.

|                 |          | Abs. (nm)/ $f_{\text{abs.}}$ |          | Flu. (nm)/ $f_{\text{flu.}}$ |
|-----------------|----------|------------------------------|----------|------------------------------|
| C               | 257/0.08 | 227/0.14                     | 203/0.18 | 337/0.06                     |
| tC <sup>O</sup> | 354/0.14 | 271/0.35                     |          | 445/0.24                     |
| pC              | 341/0.08 | 229/0.34                     | 214/0.07 | 448/0.10                     |
| tC              | 362/0.07 | 281/0.24                     | 243/0.12 | 488/0.12                     |
| <sup>DMAC</sup> | 396/0.08 | 246/0.05                     |          | 503/0.12                     |
| C1              | 331/0.16 | 261/0.49                     |          | 377/0.31                     |
| 5hmC            | 264/0.08 | 225/0.14                     | 203/0.38 | 339/0.09                     |
| dCyd            | 260/0.13 | 229/0.14                     | 207/0.16 | 336/0.10                     |
| 5mC             | 265/0.09 | 226/0.14                     | 203/0.35 | 337/0.10                     |

**Fig. S3.** Optimized geometries and side-view graphs of C and  $tC^O$  in water. The  $\Delta d$  (Å) is located around the C3 of the 6-membered ring (green underpainting in structure chart), which denotes the maximum difference of some important bond lengths between natural base and its analogues.

**(a)  $S_0$  state**

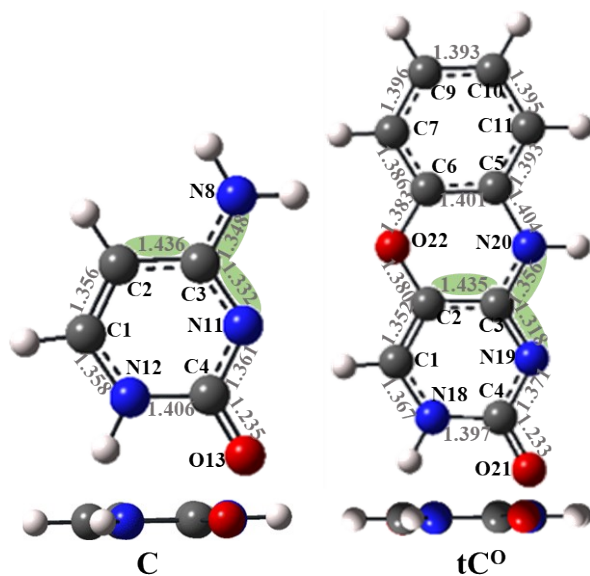

**(b)  $S_1$  state**

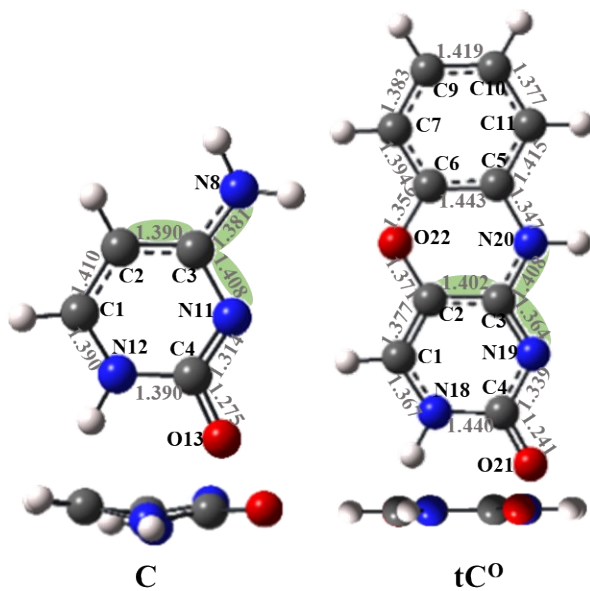

## I. Calculation details of the binding energy:

The intermolecular binding energy  $\Delta E$  of Watson-Crick (WC) base pair was calculated to evaluate the stability of base pair, which is defined as the energy differences between the complex ( $E_{AB}$ ) and the individual bases ( $E_A$  and  $E_B$ )

$$\Delta E = E_{AB} - (E_A + E_B) + E_{BSSE}. \quad (1)$$

Herein, the binding energies of all considered base pairs are corrected for basis set superposition error (BSSE) using the counterpoise correction method.

**Fig. S4.** Optimized structures of base pairs.

### (a) Base pairs in $S_0$ state

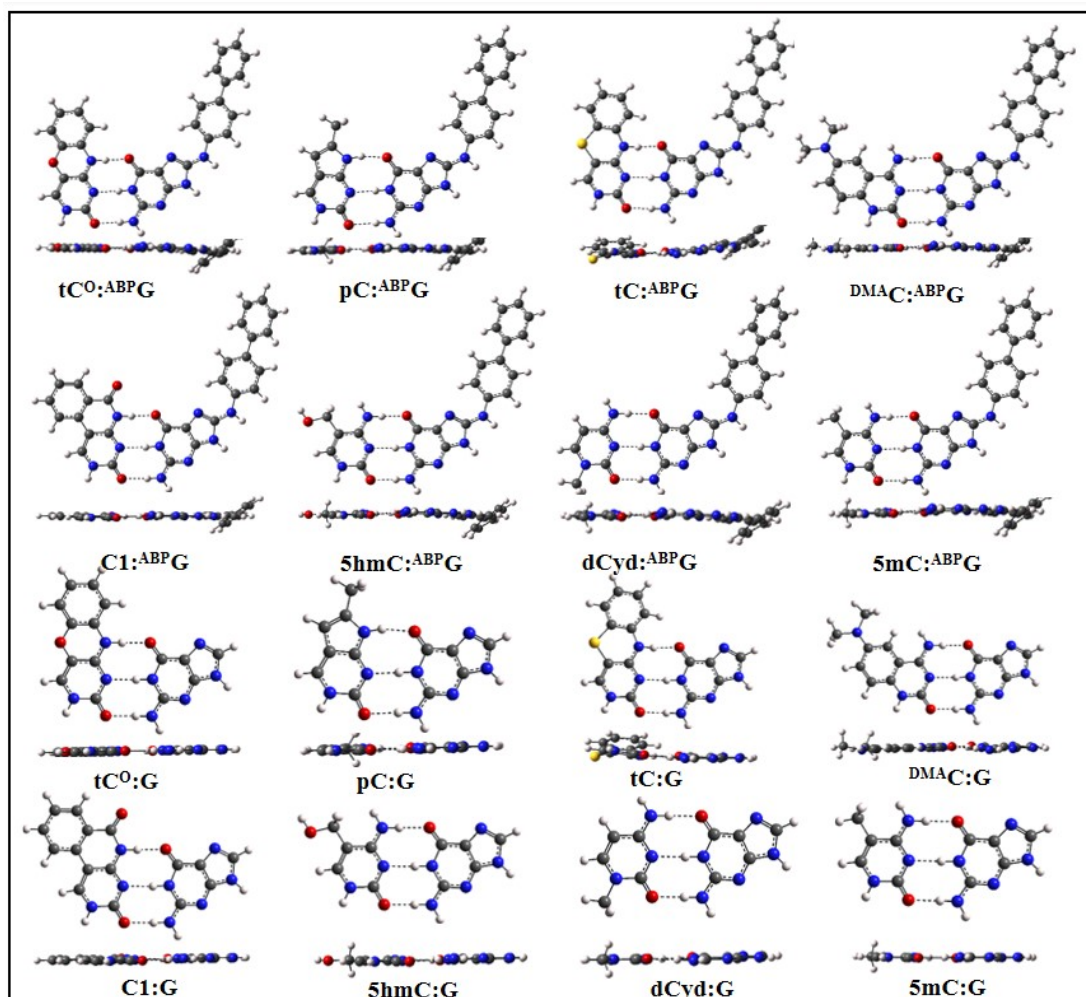



**(b) Base pairs in  $S_1$  state**

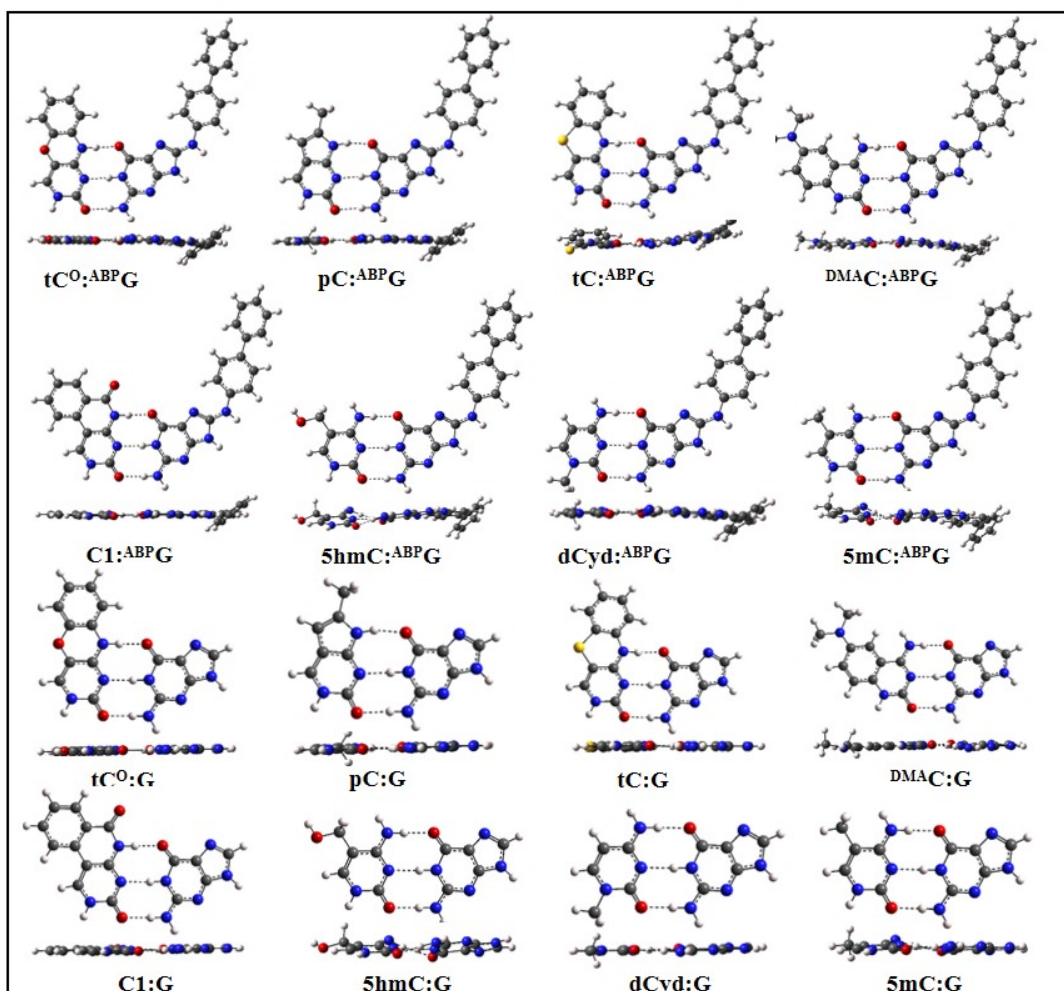

**Table S4.** The structures coordinates for base pairs optimized with B3LYP-D3/6-311++G(d,p).

**tC<sup>O</sup>:ABPG (S<sub>0</sub>)**

|    |   | X        | Y        | Z        |    |   | X        | Y        | Z        |
|----|---|----------|----------|----------|----|---|----------|----------|----------|
| 1  | C | -0.03318 | -1.97925 | 0.01285  | 31 | H | 4.86657  | 1.56510  | 0.01473  |
| 2  | C | -0.10144 | -3.37130 | 0.01801  | 32 | H | 8.84430  | -0.02496 | 1.27600  |
| 3  | C | -2.32670 | -3.47228 | 0.02849  | 33 | H | 10.67953 | 1.61493  | 1.24338  |
| 4  | C | -1.24897 | -1.25412 | 0.01149  | 34 | H | 10.45801 | 3.71848  | -0.06295 |
| 5  | C | 1.99859  | -2.64885 | 0.00591  | 35 | H | 8.37533  | 4.14528  | -1.35148 |
| 6  | H | -3.29003 | -1.62968 | 0.00218  | 36 | H | 6.55303  | 2.49014  | -1.34934 |
| 7  | H | 1.51343  | -4.75468 | 0.01531  | 37 | N | 3.36207  | -2.78233 | 0.00030  |
| 8  | O | -1.41050 | -0.01539 | 0.00377  | 38 | H | 3.70948  | -3.73003 | 0.00141  |
| 9  | N | 1.29005  | -1.54455 | 0.00541  | 39 | C | -7.37603 | 0.55498  | -0.06832 |
| 10 | N | 1.20599  | -3.79247 | 0.01359  | 40 | C | -6.24691 | 1.29712  | -0.02100 |
| 11 | N | -1.18991 | -4.15859 | 0.02570  | 41 | C | -4.99315 | 0.59819  | -0.01880 |
| 12 | N | -2.36760 | -2.10108 | 0.01838  | 42 | C | -6.06161 | -1.48282 | -0.10678 |
| 13 | N | -3.50967 | -4.11959 | 0.06147  | 43 | C | -3.88631 | 2.71732  | 0.06948  |
| 14 | H | -4.40230 | -3.62893 | -0.03304 | 44 | C | -5.12196 | 3.37671  | 0.06778  |
| 15 | H | -3.49060 | -5.12301 | -0.02174 | 45 | C | -5.18986 | 4.76009  | 0.11127  |
| 16 | C | 6.45526  | 0.11197  | -0.02539 | 46 | H | -6.16253 | 5.23662  | 0.10835  |
| 17 | C | 6.71699  | -1.26856 | -0.03016 | 47 | C | -4.01020 | 5.50655  | 0.15772  |
| 18 | C | 5.68912  | -2.19882 | -0.02268 | 48 | C | -2.77508 | 4.86091  | 0.15988  |
| 19 | C | 4.34602  | -1.78441 | -0.00795 | 49 | C | -2.71260 | 3.46802  | 0.11584  |
| 20 | C | 4.06603  | -0.41028 | -0.00176 | 50 | H | -8.11273 | -1.37722 | -0.14783 |
| 21 | C | 5.11189  | 0.50930  | -0.01109 | 51 | H | -8.36604 | 0.98754  | -0.07504 |
| 22 | C | 7.55676  | 1.10491  | -0.03531 | 52 | H | -2.94899 | 0.81461  | 0.02024  |
| 23 | C | 8.74116  | 0.87819  | 0.68522  | 53 | H | -4.06380 | 6.58776  | 0.19183  |
| 24 | C | 9.77745  | 1.80965  | 0.67388  | 54 | H | -1.85775 | 5.43566  | 0.19585  |
| 25 | C | 9.65257  | 2.99296  | -0.05515 | 55 | H | -1.75925 | 2.95230  | 0.11720  |
| 26 | C | 8.48107  | 3.23325  | -0.77440 | 56 | N | -7.27553 | -0.81191 | -0.11095 |
| 27 | C | 7.44679  | 2.29958  | -0.76609 | 57 | N | -4.92638 | -0.72770 | -0.05896 |
| 28 | H | 7.74056  | -1.62362 | -0.06242 | 58 | N | -3.85704 | 1.31533  | 0.02496  |
| 29 | H | 5.92576  | -3.25781 | -0.03764 | 59 | O | -6.03950 | -2.72218 | -0.14586 |
| 30 | H | 3.04117  | -0.07352 | 0.01855  | 60 | O | -6.31389 | 2.67274  | 0.02201  |

**tC<sup>O</sup>:ABPG (S<sub>1</sub>)**

|    |   | X        | Y        | Z        |    |   | X        | Y        | Z        |
|----|---|----------|----------|----------|----|---|----------|----------|----------|
| 1  | C | -0.03297 | -1.96692 | 0.02857  | 31 | H | -4.84989 | 1.596075 | -0.02570 |
| 2  | C | 0.05603  | -3.39023 | 0.00166  | 32 | H | -8.82262 | 0.02080  | -1.29776 |
| 3  | C | 2.28935  | -3.39728 | 0.01800  | 33 | H | 10.64658 | 1.67460  | -1.27304 |
| 4  | C | 1.19851  | -1.20816 | 0.04200  | 34 | H | 10.41944 | 3.76923  | 0.04456  |
| 5  | C | -2.03805 | -2.67907 | 0.00513  | 35 | H | -8.34451 | 4.17961  | 1.34880  |
| 6  | H | 3.27665  | -1.53580 | 0.01039  | 36 | H | -6.52885 | 2.51635  | 1.34712  |
| 7  | H | -1.55284 | -4.77743 | -0.03051 | 37 | N | -3.37330 | -2.76728 | -0.00308 |
| 8  | O | 1.28740  | 0.01766  | 0.05573  | 38 | H | -3.74794 | -3.70815 | -0.01629 |
| 9  | N | -1.30857 | -1.55003 | 0.03044  | 39 | C | 7.36079  | 0.40571  | 0.09974  |
| 10 | N | -1.24600 | -3.81408 | -0.01330 | 40 | C | 6.24024  | 1.17124  | -0.12157 |
| 11 | N | 1.14214  | -4.12472 | -0.00418 | 41 | C | 4.99010  | 0.57755  | -0.19891 |
| 12 | N | 2.32324  | -2.02743 | 0.03265  | 42 | C | 5.88466  | -1.56096 | 0.14727  |
| 13 | N | 3.44107  | -4.04496 | 0.02532  | 43 | C | 3.96679  | 2.73457  | -0.23727 |
| 14 | H | 4.37034  | -3.55473 | 0.10292  | 44 | C | 5.24807  | 3.31281  | -0.14519 |
| 15 | H | 3.39791  | -5.05361 | 0.02033  | 45 | C | 5.40261  | 4.67656  | 0.05459  |
| 16 | C | -6.44251 | 0.14384  | 0.01695  | 46 | H | 6.40650  | 5.07993  | 0.12076  |
| 17 | C | -6.71482 | -1.23331 | 0.02362  | 47 | C | 4.27960  | 5.50306  | 0.15861  |
| 18 | C | -5.69026 | -2.16707 | 0.01758  | 48 | C | 3.00513  | 4.94350  | 0.07116  |
| 19 | C | -4.35249 | -1.74794 | 0.00428  | 49 | C | 2.85083  | 3.56997  | -0.11977 |
| 20 | C | -4.05699 | -0.37982 | -0.00404 | 50 | H | 7.91377  | -1.61073 | 0.35793  |
| 21 | C | -5.09674 | 0.54160  | 0.00264  | 51 | H | 8.36565  | 0.77847  | 0.18869  |
| 22 | C | -7.53784 | 1.14250  | 0.02407  | 52 | H | 2.95971  | 0.93271  | -0.24892 |
| 23 | C | -8.71800 | 0.92163  | -0.70401 | 53 | H | 4.40624  | 6.56840  | 0.30850  |
| 24 | C | -9.74714 | 1.86035  | -0.69690 | 54 | H | 2.12572  | 5.57168  | 0.15430  |
| 25 | C | -9.61839 | 3.03896  | 0.03889  | 55 | H | 1.86105  | 3.13117  | -0.18569 |
| 26 | C | -8.45100 | 3.27077  | 0.76733  | 56 | N | 7.13787  | -0.98399 | 0.21928  |
| 27 | C | -7.42108 | 2.33294  | 0.75956  | 57 | N | 4.80325  | -0.79121 | -0.04975 |
| 28 | H | -7.73961 | -1.58233 | 0.05597  | 58 | N | 3.85715  | 1.36260  | -0.45780 |
| 29 | H | -5.92892 | -3.22496 | 0.03280  | 59 | O | 5.81338  | -2.81977 | 0.27628  |
| 30 | H | -3.03211 | -0.04468 | -0.02425 | 60 | O | 6.39486  | 2.54715  | -0.30355 |

**tC<sup>O</sup>:G (S<sub>0</sub>)**

|    |   | X        | Y        | Z        |    |   | X        | Y        | Z        |
|----|---|----------|----------|----------|----|---|----------|----------|----------|
| 1  | C | 3.44567  | -1.38564 | 0.00030  | 20 | C | -2.65061 | -1.33628 | -0.00069 |
| 2  | C | 4.49041  | -0.45666 | -0.00014 | 21 | C | -3.93739 | -0.78365 | -0.00064 |
| 3  | C | 3.16741  | 1.33657  | -0.00100 | 22 | C | -5.05993 | -1.59612 | -0.00005 |
| 4  | C | 2.11100  | -0.89303 | 0.00027  | 23 | H | -6.03987 | -1.13479 | -0.00003 |
| 5  | C | 5.24027  | -2.53795 | 0.00083  | 24 | C | -4.90549 | -2.98433 | 0.00045  |
| 6  | H | 1.12413  | 0.92875  | -0.00030 | 25 | C | -3.62955 | -3.54500 | 0.00042  |
| 7  | H | 6.57920  | -0.86557 | 0.00005  | 26 | C | -2.50301 | -2.72231 | -0.00012 |
| 8  | H | 5.96499  | -3.33772 | 0.00117  | 27 | H | -2.09382 | 4.52582  | 0.00246  |
| 9  | O | 1.05134  | -1.54634 | 0.00074  | 28 | H | -4.09823 | 3.24612  | 0.00126  |
| 10 | N | 3.93945  | -2.68102 | 0.00090  | 29 | H | -0.58098 | -0.87627 | -0.00088 |
| 11 | N | 5.63097  | -1.21379 | 0.00022  | 30 | H | -5.78321 | -3.61886 | 0.00088  |
| 12 | N | 4.41523  | 0.88701  | -0.00075 | 31 | H | -3.50498 | -4.62090 | 0.00084  |
| 13 | N | 2.07027  | 0.50557  | -0.00024 | 32 | H | -1.50457 | -3.14415 | -0.00014 |
| 14 | N | 2.92252  | 2.65987  | -0.00239 | 33 | N | -2.01227 | 3.51827  | 0.00152  |
| 15 | H | 1.97520  | 3.04709  | -0.00052 | 34 | N | -0.60978 | 1.63123  | -0.00009 |
| 16 | C | -3.14247 | 2.74210  | 0.00091  | 35 | N | -1.53770 | -0.48176 | -0.00131 |
| 17 | C | -3.01627 | 1.39589  | -0.00024 | 36 | O | 0.25088  | 3.74895  | 0.00153  |
| 18 | C | -1.68703 | 0.85438  | -0.00055 | 37 | O | -4.13216 | 0.58760  | -0.00140 |
| 19 | C | -0.73018 | 2.99018  | 0.00099  | 38 | H | 3.71394  | 3.28230  | -0.00104 |

**tC<sup>O</sup>:G (S<sub>1</sub>)**

|    |   | X       | Y        | Z        |    |   | X       | Y        | Z        |
|----|---|---------|----------|----------|----|---|---------|----------|----------|
| 1  | C | 3.44528 | -1.38480 | 0.00036  | 20 | C | 2.60733 | -1.34637 | -0.00014 |
| 2  | C | 4.48452 | -0.44957 | -0.00034 | 21 | C | 3.92671 | -0.75822 | -0.00004 |
| 3  | C | 3.14795 | 1.33378  | -0.00139 | 22 | C | 5.07134 | -1.55313 | -0.00019 |
| 4  | C | 2.10814 | -0.89882 | 0.00024  | 23 | H | 6.03860 | -1.06650 | -0.00011 |
| 5  | C | 5.24707 | -2.52639 | 0.00101  | 24 | C | 4.94666 | -2.93122 | -0.00043 |
| 6  | H | 1.10126 | 0.92067  | -0.00056 | 25 | C | 3.65851 | -3.52666 | -0.00049 |
| 7  | H | 6.57606 | -0.84627 | -0.00044 | 26 | C | 2.51542 | -2.76022 | -0.00035 |
| 8  | H | 5.97645 | -3.32192 | 0.00148  | 27 | H | 2.07367 | 4.51512  | 0.00136  |
| 9  | O | 1.05335 | -1.56319 | 0.00085  | 28 | H | 4.12091 | 3.23908  | 0.00100  |
| 10 | N | 3.94698 | -2.67727 | 0.00112  | 29 | H | 0.56633 | -0.93274 | 0.00018  |
| 11 | N | 5.62995 | -1.20006 | -0.00004 | 30 | H | 5.83081 | -3.55520 | -0.00056 |
| 12 | N | 4.40022 | 0.89299  | -0.00122 | 31 | H | 3.57380 | -4.60650 | -0.00066 |
| 13 | N | 2.05586 | 0.49731  | -0.00064 | 32 | H | 1.53207 | -3.21418 | -0.00040 |
| 14 | N | 2.89673 | 2.65613  | -0.00271 | 33 | N | 2.01472 | 3.50590  | 0.00107  |
| 15 | H | 1.94748 | 3.04399  | -0.00115 | 34 | N | 0.56170 | 1.62910  | 0.00018  |
| 16 | C | 3.15873 | 2.75020  | 0.00085  | 35 | N | 1.52850 | -0.54382 | -0.00005 |
| 17 | C | 2.98060 | 1.38480  | 0.00044  | 36 | O | 0.24628 | 3.76887  | 0.00079  |
| 18 | C | 1.68885 | 0.85044  | 0.00015  | 37 | O | 4.09782 | 0.58913  | 0.00030  |
| 19 | C | 0.70218 | 2.96016  | 0.00067  | 38 | H | 3.68696 | 3.28013  | -0.00173 |

**Table S5.** Absorption/fluorescence wavelengths ( $\lambda$ ) and corresponding oscillator strengths ( $f_{\text{abs.}}$  and  $f_{\text{flu.}}$ ) of base pairs.

|                 | Abs. (nm)/ $f_{\text{abs.}}$      |          |                     |          | Flu. (nm)/ $f_{\text{flu.}}$         |                        |
|-----------------|-----------------------------------|----------|---------------------|----------|--------------------------------------|------------------------|
|                 | Base pairing with <sup>ABPG</sup> |          | Base pairing with G |          | Base pairing<br>with <sup>ABPG</sup> | Base pairing<br>with G |
| C               | 337/0.79                          | 265/0.43 | 265/0.12            | 246/0.29 | 632/0                                | 840/0                  |
| tC <sup>O</sup> | 336/0.80                          |          | 362/0.15            | 271/0.27 | 662/0                                | 462/0.27               |
| pC              | 337/0.73                          | 268/0.54 | 345/0.08            | 244/0.31 | 657/0                                | 469/0.09               |
| tC              | 335/0.80                          |          | 375/0.08            | 281/0.22 | 505/0.15                             | 506/0.15               |
| <sup>DMAC</sup> | 337/0.80                          |          | 400/0.09            | 269/0.19 | 503/0.12                             | 504/0.12               |
| C1              | 335/0.81                          |          | 328/0.15            | 262/0.47 | 778/0                                | 598/0                  |
| 5hmC            | 337/0.78                          | 268/0.49 | 265/0.13            | 245/0.26 | 628/0                                | 513/0                  |
| dCyd            | 337/0.78                          | 265/0.29 | 258/0.16            | 245/0.30 | 619/0                                | 815/0                  |
| 5mC             | 337/0.77                          | 267/0.52 | 265/0.13            | 245/0.36 | 615/0                                | 809/0                  |

**Fig. S5.** Absorption spectra of base pairs ( $tC^O:ABP^G$ ,  $tC^O:G$ ) in water solution.

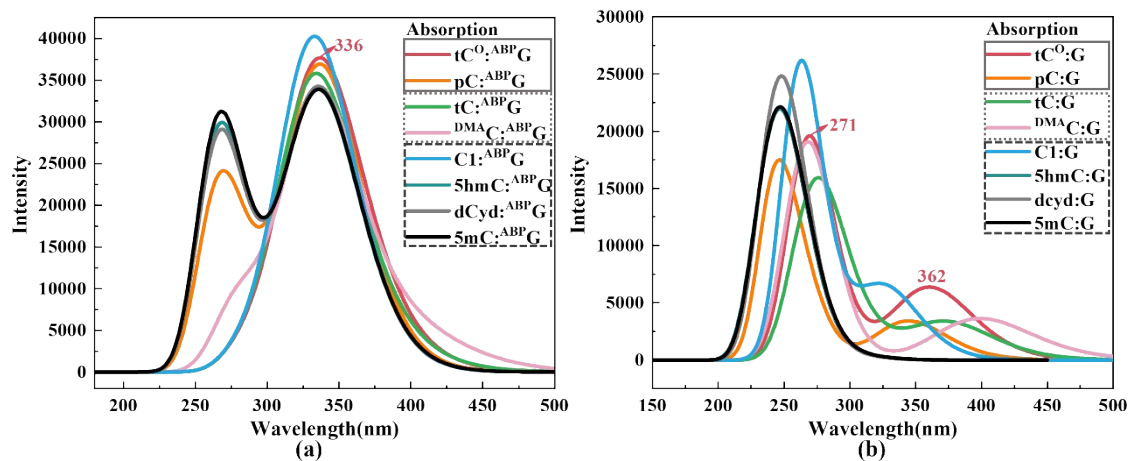

**Fig. S6.** FMOs involved in the absorption and emission processes of tC:<sup>ABPG</sup> (upper left), tC:G (upper right), C1:<sup>ABPG</sup> (lower left), C1:G (lower right).

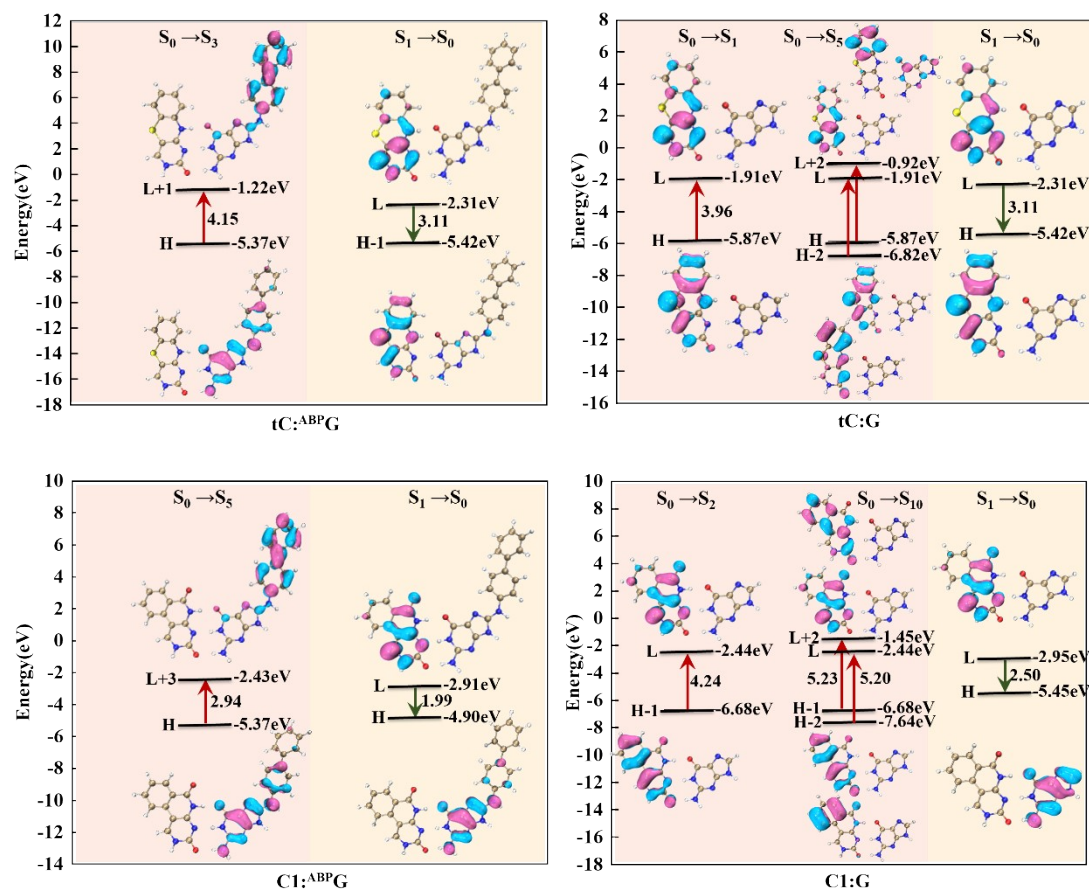

**Table S6.** Absorption/fluorescence wavelengths ( $\lambda$ ), corresponding oscillator strengths ( $f_{\text{abs.}}$  and  $f_{\text{flu.}}$ ), and state assignments for tC:<sup>ABPG</sup>, tC:G, C1:<sup>ABPG</sup>, C1:G.

| Optical spectral                | Base pair           | Transition                     | $\lambda$ (nm) | $f_{\text{abs.}}/f_{\text{flu.}}$                | Assignment(CI/Type/Gap(eV))                    |
|---------------------------------|---------------------|--------------------------------|----------------|--------------------------------------------------|------------------------------------------------|
| Absorption                      | tC: <sup>ABPG</sup> | S <sub>0</sub> →S <sub>3</sub> | 335            | 0.80                                             | H→L+1(98.2%/ππ*/4.15)                          |
|                                 |                     | S <sub>1</sub> →S <sub>0</sub> | 505            | 0.15                                             | L→H-1(76.3%/ππ*/3.11)                          |
|                                 | tC:G                | S <sub>0</sub> →S <sub>1</sub> | 375            | 0.08                                             | H→L(94.5%/ππ*/3.96)                            |
|                                 |                     | S <sub>0</sub> →S <sub>5</sub> | 281            | 0.22                                             | H-2→L(57.8%/ππ*/4.91)<br>H→L+2(30.6%/ππ*/4.95) |
|                                 | C1: <sup>ABPG</sup> | S <sub>0</sub> →S <sub>5</sub> | 335            | 0.81                                             | H→L+3(97.1%/ππ*/2.94)                          |
|                                 | C1:G                | S <sub>0</sub> →S <sub>2</sub> | 328            | 0.15                                             | H-1→L(95.4%/ππ*/4.24)                          |
| S <sub>0</sub> →S <sub>10</sub> |                     | 262                            | 0.47           | H-1→L+2(50.5%/ππ*/5.23)<br>H-2→L(25.8%/ππ*/5.20) |                                                |
| Fluorescence                    | tC: <sup>ABPG</sup> | S <sub>1</sub> →S <sub>0</sub> | 505            | 0.15                                             | L→H-1(76.3%/ππ*/3.11)                          |
|                                 | tC:G                | S <sub>1</sub> →S <sub>0</sub> | 506            | 0.15                                             | L→H(98.8%/ππ*/3.11)                            |
|                                 | C1: <sup>ABPG</sup> | S <sub>1</sub> →S <sub>0</sub> | 778            | 0                                                | L→H(99.7%/ππ*/1.99)                            |
|                                 | C1:G                | S <sub>1</sub> →S <sub>0</sub> | 598            | 0                                                | L→H(99.9%/ππ*/2.50)                            |

**Fig. S7.** Fluorescence spectra of monomer ( $tC^O$ ) (left panel) and related base pairs [ $tC^O:ABP^G$  (dotted line),  $tC^O:G$  (solid line) right panel] determined by three functional (PBE0, wB97XD, CAM-B3LYP) with 6-311++G(d,p) basis set in water solution.

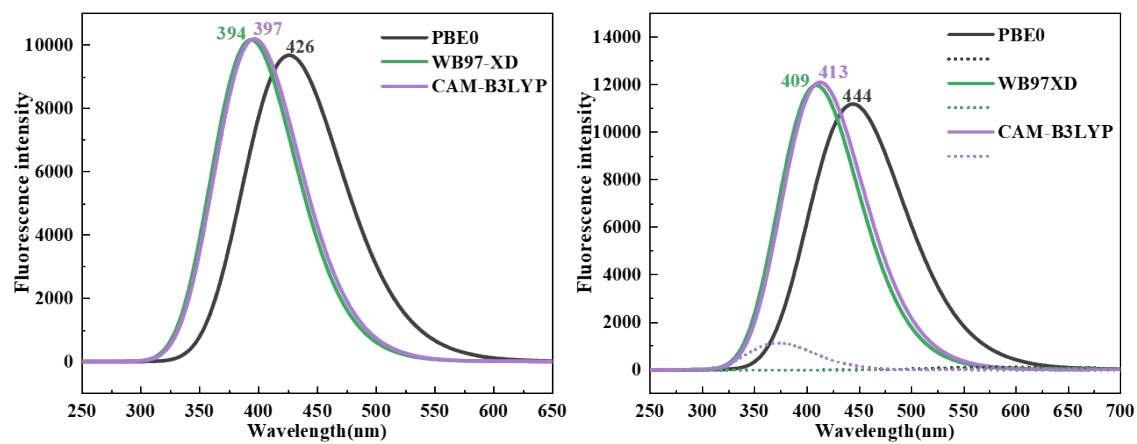



**Fig. S8.** FMOs involved in the emission processes of  $tC^O$  (left panel),  $tC^O:G$  (middle panel),  $tC^O:ABPG$  (right panel) determined by wB97XD functional with 6-311++G(d,p) basis set in water solution.

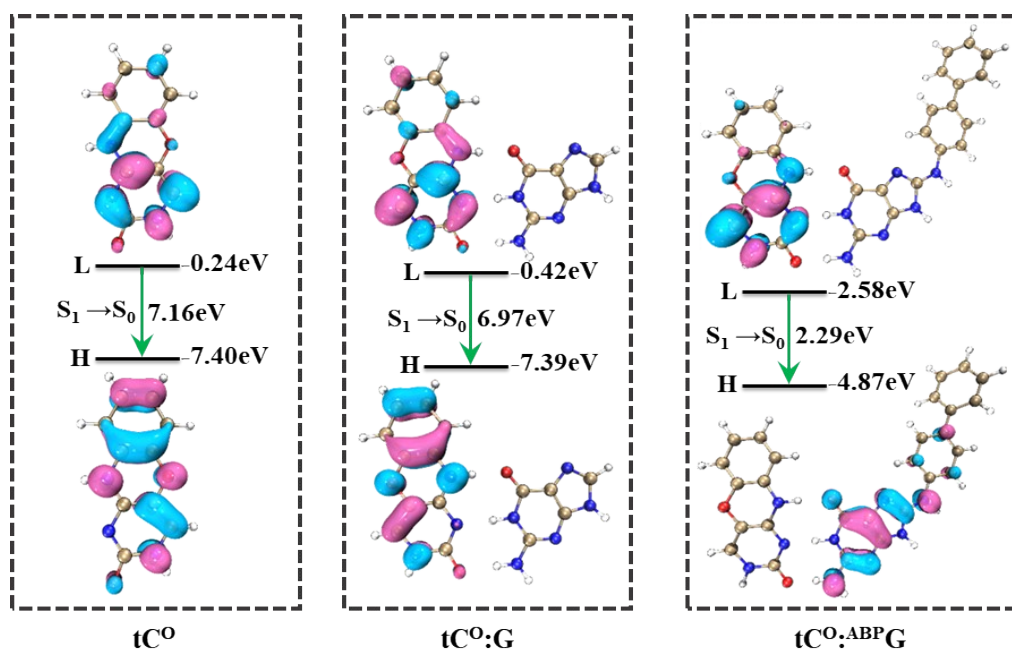

**Fig. S9.** Fluorescence spectra of monomer ( $tC^O$ ) and related base pairs ( $tC^O:ABPG$ ,  $tC^O:G$ ) in continuum with a low dielectric constant ( $\epsilon \sim 4$ ).

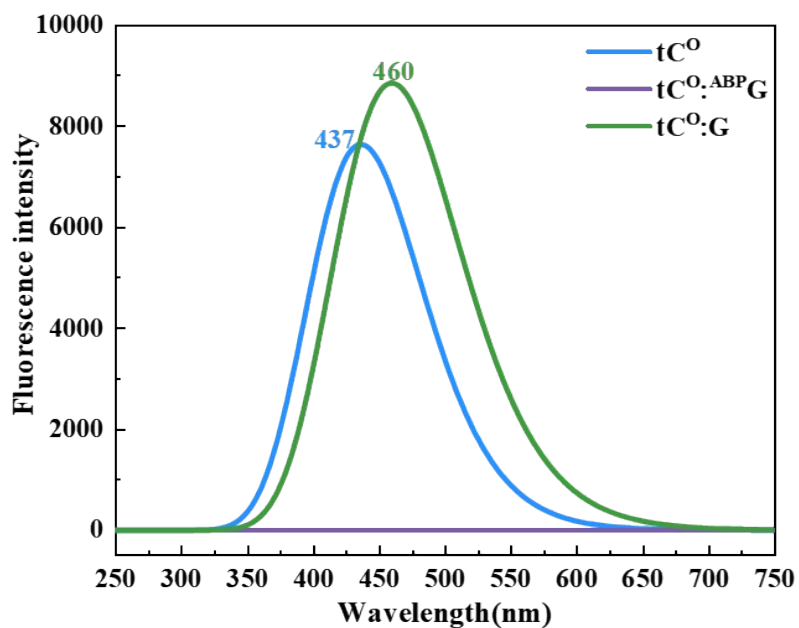

**Fig. S10.** FMOs involved in the emission processes of monomer ( $tC^O$ ) and related base pairs ( $tC^O:ABPG$ ,  $tC^O:G$ ) in continuum with a low dielectric constant ( $\epsilon \sim 4$ ).

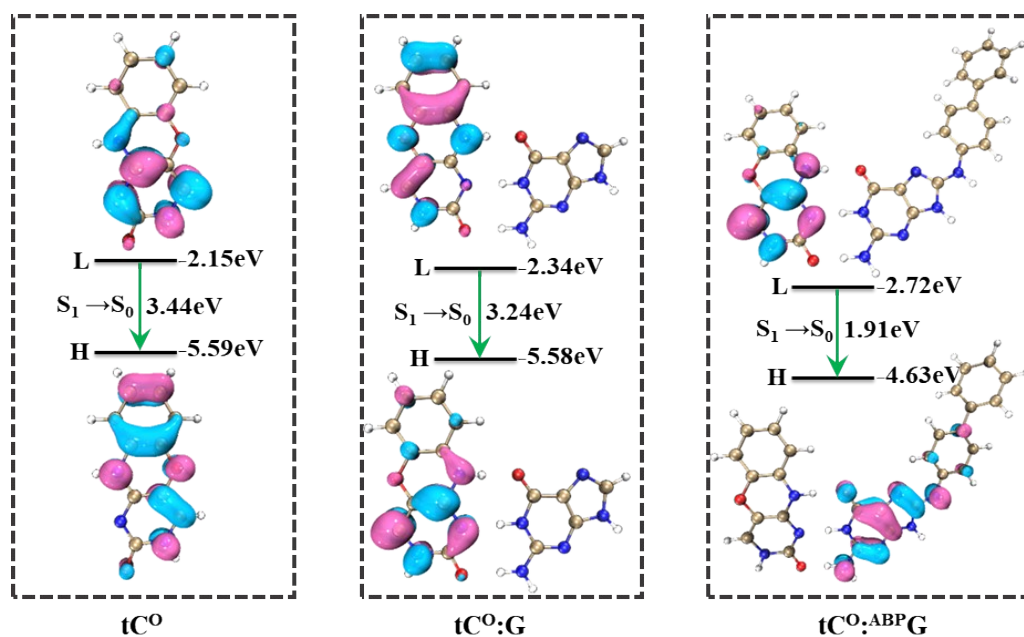

**Table S7.** The structures coordinates for monomers and base pairs of linking to deoxyribose optimized with B3LYP-D3/6-311++G(d,p).

**dtC<sup>0</sup> (S<sub>0</sub>)**

|    |   | X        | Y        | Z        |    |   | X        | Y        | Z        |
|----|---|----------|----------|----------|----|---|----------|----------|----------|
| 1  | C | 0.30401  | -0.09169 | 0.01485  | 20 | O | 1.32524  | 3.29888  | -0.15931 |
| 2  | C | -1.03825 | 0.05016  | 0.04072  | 21 | O | -1.85521 | -1.06066 | 0.13708  |
| 3  | C | -1.55999 | 1.37960  | -0.04248 | 22 | H | 2.02179  | -3.50838 | 0.33069  |
| 4  | C | 0.57623  | 2.31999  | -0.12042 | 23 | O | 2.36043  | -2.60683 | 0.33311  |
| 5  | C | -3.77378 | 0.42356  | 0.00299  | 24 | C | 3.34659  | -2.48172 | -0.69910 |
| 6  | C | -3.22227 | -0.86189 | 0.09114  | 25 | H | 2.91151  | -2.70575 | -1.67919 |
| 7  | C | -4.03960 | -1.98071 | 0.14247  | 26 | H | 4.18413  | -3.16703 | -0.52247 |
| 8  | H | -3.57957 | -2.95896 | 0.21036  | 27 | C | 3.88029  | -1.06021 | -0.71749 |
| 9  | C | -5.42692 | -1.82703 | 0.10754  | 28 | H | 4.69732  | -1.01463 | -1.44268 |
| 10 | C | -5.98457 | -0.55305 | 0.01983  | 29 | O | 2.84802  | -0.14366 | -1.14759 |
| 11 | C | -5.15914 | 0.57029  | -0.03302 | 30 | C | 2.56498  | 0.81622  | -0.12915 |
| 12 | H | 0.79501  | -1.05631 | 0.05080  | 31 | H | 2.98862  | 1.78187  | -0.39571 |
| 13 | H | -3.28334 | 2.46499  | -0.11427 | 32 | C | 4.37701  | -0.53667 | 0.63918  |
| 14 | H | -6.06279 | -2.70279 | 0.14867  | 33 | H | 4.65705  | -1.35406 | 1.30860  |
| 15 | H | -7.05983 | -0.42646 | -0.00812 | 34 | C | 3.17968  | 0.25770  | 1.15883  |
| 16 | H | -5.58446 | 1.56513  | -0.10168 | 35 | H | 2.47988  | -0.41892 | 1.65092  |
| 17 | N | 1.11189  | 1.01570  | -0.07139 | 36 | H | 3.46283  | 1.04626  | 1.85651  |
| 18 | N | -0.78853 | 2.44303  | -0.11845 | 37 | O | 5.50975  | 0.30294  | 0.37310  |
| 19 | N | -2.90867 | 1.52822  | -0.04545 | 38 | H | 5.81756  | 0.67375  | 1.20816  |

$dtC^0 (S_1)$ 

|    |   | X        | Y        | Z        |    |   | X        | Y        | Z        |
|----|---|----------|----------|----------|----|---|----------|----------|----------|
| 1  | C | 0.30855  | -0.11618 | 0.01592  | 20 | O | 1.33876  | 3.28978  | -0.23701 |
| 2  | C | -1.05207 | 0.07550  | 0.01114  | 21 | O | -1.85506 | -1.03383 | 0.07628  |
| 3  | C | -1.57273 | 1.37298  | -0.07478 | 22 | H | 2.05985  | -3.53702 | 0.14272  |
| 4  | C | 0.53523  | 2.35068  | -0.15923 | 23 | O | 2.38931  | -2.63476 | 0.21177  |
| 5  | C | -3.78801 | 0.45330  | 0.00721  | 24 | C | 3.40091  | -2.43658 | -0.78412 |
| 6  | C | -3.20107 | -0.86214 | 0.07311  | 25 | H | 2.99572  | -2.61072 | -1.78698 |
| 7  | C | -3.99789 | -2.00389 | 0.14382  | 26 | H | 4.24337  | -3.12002 | -0.62291 |
| 8  | H | -3.51112 | -2.96984 | 0.19323  | 27 | C | 3.91487  | -1.00892 | -0.70948 |
| 9  | C | -5.37574 | -1.87829 | 0.14901  | 28 | H | 4.75997  | -0.91981 | -1.39837 |
| 10 | C | -5.96855 | -0.59165 | 0.08473  | 29 | O | 2.89199  | -0.08205 | -1.13016 |
| 11 | C | -5.19980 | 0.54882  | 0.01588  | 30 | C | 2.54655  | 0.82103  | -0.06534 |
| 12 | H | 0.77993  | -1.08976 | 0.03637  | 31 | H | 2.97208  | 1.80199  | -0.26084 |
| 13 | H | -3.34648 | 2.46203  | -0.10344 | 32 | C | 4.35504  | -0.55498 | 0.69111  |
| 14 | H | -6.00051 | -2.76022 | 0.20224  | 33 | H | 4.62457  | -1.40455 | 1.32438  |
| 15 | H | -7.04806 | -0.50341 | 0.08969  | 34 | C | 3.12905  | 0.19314  | 1.21005  |
| 16 | H | -5.65728 | 1.52955  | -0.03322 | 35 | H | 2.42265  | -0.51773 | 1.64038  |
| 17 | N | 1.10329  | 1.00057  | -0.04957 | 36 | H | 3.37765  | 0.94620  | 1.95860  |
| 18 | N | -0.79465 | 2.48383  | -0.16063 | 37 | O | 5.48491  | 0.31271  | 0.51392  |
| 19 | N | -2.96977 | 1.52339  | -0.06022 | 38 | H | 5.75036  | 0.64715  | 1.37838  |

$dtC^{O:ABP}dG(S_0)$ 

|    |   | X        | Y        | Z        |    |   | X        | Y        | Z        |
|----|---|----------|----------|----------|----|---|----------|----------|----------|
| 1  | C | -1.20154 | -0.78431 | -0.15374 | 47 | C | 2.19614  | 5.74192  | -0.58047 |
| 2  | C | -1.27176 | -2.17066 | -0.08522 | 48 | C | 1.99666  | 4.36655  | -0.45959 |
| 3  | C | 0.93482  | -2.48664 | -0.03370 | 49 | H | 7.37321  | 1.37368  | 0.03445  |
| 4  | C | 0.07857  | -0.17917 | -0.15652 | 50 | H | 1.96851  | 1.71281  | -0.20978 |
| 5  | C | -3.29627 | -1.24699 | -0.17525 | 51 | H | 3.64865  | 7.33120  | -0.67358 |
| 6  | H | 2.07454  | -0.74744 | -0.07056 | 52 | H | 1.34051  | 6.39933  | -0.67472 |
| 7  | O | 0.35702  | 1.03803  | -0.20575 | 53 | H | 0.99768  | 3.94589  | -0.45870 |
| 8  | N | -2.47226 | -0.22632 | -0.21898 | 54 | N | 6.13840  | -0.32369 | 0.11963  |
| 9  | N | -2.62035 | -2.47755 | -0.08358 | 55 | N | 3.79520  | -0.00407 | 0.00228  |
| 10 | N | -0.26385 | -3.05639 | -0.02352 | 56 | N | 2.92095  | 2.12248  | -0.21381 |
| 11 | N | 1.11080  | -1.12740 | -0.09247 | 57 | O | 4.67813  | -2.09059 | 0.20001  |
| 12 | N | 2.04809  | -3.24791 | -0.00590 | 58 | O | 5.49970  | 3.23439  | -0.21817 |
| 13 | H | 2.98152  | -2.83988 | 0.09118  | 59 | H | -7.46610 | -3.06955 | -0.95605 |
| 14 | H | 1.92737  | -4.23774 | 0.13492  | 60 | O | -6.64874 | -3.42276 | -0.58819 |
| 15 | C | -7.28573 | 2.10513  | 0.18368  | 61 | C | -6.28965 | -4.60650 | -1.31545 |
| 16 | C | -7.70380 | 0.78417  | 0.41490  | 62 | H | -6.22044 | -4.39209 | -2.38663 |
| 17 | C | -6.82515 | -0.28298 | 0.29963  | 63 | H | -7.03069 | -5.39819 | -1.15908 |
| 18 | C | -5.48503 | -0.07540 | -0.07149 | 64 | C | -4.94211 | -5.08198 | -0.81541 |
| 19 | C | -5.05177 | 1.23876  | -0.30147 | 65 | H | -4.68706 | -6.01423 | -1.32831 |
| 20 | C | -5.94364 | 2.29991  | -0.16896 | 66 | O | -3.95501 | -4.07817 | -1.13609 |
| 21 | C | -8.22574 | 3.24478  | 0.31236  | 67 | C | -3.14537 | -3.82188 | 0.01379  |
| 22 | C | -9.56330 | 3.12795  | -0.10079 | 68 | H | -2.27206 | -4.47820 | 0.01634  |
| 23 | C | 10.44766 | 4.19800  | 0.01981  | 69 | C | -4.85680 | -5.31933 | 0.70928  |
| 24 | C | 10.01451 | 5.41262  | 0.55316  | 70 | H | -5.84954 | -5.36728 | 1.16260  |
| 25 | C | -8.68826 | 5.54439  | 0.96689  | 71 | C | -4.04712 | -4.12258 | 1.21482  |
| 26 | C | -7.80538 | 4.47278  | 0.84969  | 72 | H | -4.70835 | -3.28277 | 1.42890  |
| 27 | H | -8.72416 | 0.58813  | 0.72419  | 73 | H | -3.47278 | -4.35331 | 2.11207  |
| 28 | H | -7.16564 | -1.28475 | 0.52886  | 74 | O | -4.16311 | -6.56046 | 0.89778  |
| 29 | H | -4.02714 | 1.42018  | -0.58553 | 75 | H | -4.12167 | -6.74628 | 1.84304  |
| 30 | H | -5.58446 | 3.30212  | -0.37466 | 76 | H | 9.96182  | 2.26806  | -0.02963 |
| 31 | H | -9.90899 | 2.19872  | -0.53942 | 77 | O | 9.58278  | 1.38307  | -0.05547 |
| 32 | H | 11.47380 | 4.08568  | -0.31250 | 78 | C | 10.12255 | 0.61805  | 1.02948  |
| 33 | H | 10.70189 | 6.24577  | 0.64570  | 79 | H | 9.89637  | 1.09475  | 1.98944  |
| 34 | H | -8.34189 | 6.48051  | 1.39082  | 80 | H | 11.21057 | 0.52083  | 0.93403  |
| 35 | H | -6.78457 | 4.58361  | 1.19743  | 81 | C | 9.51011  | -0.77134 | 1.02069  |
| 36 | N | -4.66329 | -1.20879 | -0.19924 | 82 | H | 10.00688 | -1.36581 | 1.79219  |
| 37 | H | -5.15865 | -2.08441 | -0.35116 | 83 | O | 8.10309  | -0.69961 | 1.34814  |
| 38 | C | 6.34550  | 1.03327  | 0.00864  | 84 | C | 7.30713  | -1.20000 | 0.27538  |
| 39 | C | 5.29597  | 1.87360  | -0.10988 | 85 | H | 6.91280  | -2.18191 | 0.52672  |
| 40 | C | 3.98275  | 1.30419  | -0.10643 | 86 | C | 9.59736  | -1.51063 | -0.32365 |
| 41 | C | 4.84794  | -0.86455 | 0.11355  | 87 | H | 10.41572 | -1.13069 | -0.94039 |
| 42 | C | 3.08951  | 3.50962  | -0.33745 | 88 | C | 8.22764  | -1.24849 | -0.94878 |

|    |   |         |         |          |    |   |         |          |          |
|----|---|---------|---------|----------|----|---|---------|----------|----------|
| 43 | C | 4.38420 | 4.04529 | -0.33840 | 89 | H | 8.23794 | -0.28338 | -1.45668 |
| 44 | C | 4.58758 | 5.41100 | -0.45829 | 90 | H | 7.92911 | -2.02070 | -1.65807 |
| 45 | H | 5.60199 | 5.79073 | -0.45495 | 91 | O | 9.79854 | -2.89922 | -0.02448 |
| 46 | C | 3.48832 | 6.26414 | -0.57995 | 92 | H | 9.82674 | -3.38916 | -0.85446 |

**dtC<sup>O</sup>:ABPdG (S<sub>1</sub>)**

|    |   | X        | Y        | Z        |    |   | X        | Y        | Z        |
|----|---|----------|----------|----------|----|---|----------|----------|----------|
| 1  | C | -1.25604 | -0.79259 | -0.02316 | 47 | C | 2.18620  | 5.88309  | -0.01984 |
| 2  | C | -1.26744 | -2.21403 | -0.09824 | 48 | C | 1.95128  | 4.52315  | -0.22407 |
| 3  | C | 0.96078  | -2.37873 | -0.13642 | 49 | H | 7.28365  | 1.41562  | 0.01924  |
| 4  | C | 0.02525  | -0.12190 | -0.01203 | 50 | H | 1.90519  | 1.88646  | -0.35361 |
| 5  | C | -3.31003 | -1.36711 | -0.01785 | 51 | H | 3.68190  | 7.42066  | 0.22298  |
| 6  | H | 2.07248  | -0.59229 | -0.11062 | 52 | H | 1.34550  | 6.56050  | 0.07609  |
| 7  | O | 0.20072  | 1.09382  | 0.04025  | 53 | H | 0.93731  | 4.14318  | -0.28773 |
| 8  | N | -2.49593 | -0.29108 | 0.02849  | 54 | N | 6.00570  | -0.30151 | -0.09206 |
| 9  | N | -2.59914 | -2.56512 | -0.08546 | 55 | N | 3.66078  | 0.06135  | -0.21167 |
| 10 | N | -0.23491 | -3.02078 | -0.14809 | 56 | N | 2.81975  | 2.26380  | -0.58930 |
| 11 | N | 1.09105  | -1.01575 | -0.07634 | 57 | O | 4.51002  | -2.03190 | 0.05729  |
| 12 | N | 2.06435  | -3.10424 | -0.18435 | 58 | O | 5.43065  | 3.29908  | -0.43625 |
| 13 | H | 3.02278  | -2.67790 | -0.11121 | 59 | H | -7.45183 | -3.05266 | -0.02085 |
| 14 | H | 1.95256  | -4.10688 | -0.21830 | 60 | O | -6.56033 | -3.41458 | 0.03705  |
| 15 | C | -7.12514 | 2.10521  | 0.11056  | 61 | C | -6.42244 | -4.48441 | -0.91430 |
| 16 | C | -7.43307 | 0.94312  | 0.83468  | 62 | H | -6.55235 | -4.10715 | -1.93315 |
| 17 | C | -6.59847 | -0.16622 | 0.79867  | 63 | H | -7.16489 | -5.26577 | -0.72435 |
| 18 | C | -5.43112 | -0.13694 | 0.03057  | 64 | C | -5.03390 | -5.06955 | -0.76633 |
| 19 | C | -5.11145 | 1.00387  | -0.70913 | 65 | H | -4.93071 | -5.91359 | -1.45289 |
| 20 | C | -5.95139 | 2.10939  | -0.65945 | 66 | O | -4.06329 | -4.05406 | -1.12700 |
| 21 | C | -8.01438 | 3.29168  | 0.15422  | 67 | C | -3.09028 | -3.93790 | -0.09725 |
| 22 | C | -9.41039 | 3.14477  | 0.16941  | 68 | H | -2.21680 | -4.55571 | -0.31686 |
| 23 | C | 10.24475 | 4.25967  | 0.21133  | 69 | C | -4.67309 | -5.53178 | 0.66033  |
| 24 | C | -9.70040 | 5.54416  | 0.23994  | 70 | H | -5.56597 | -5.67352 | 1.27325  |
| 25 | C | -8.31433 | 5.70411  | 0.22574  | 71 | C | -3.78553 | -4.40019 | 1.18462  |
| 26 | C | -7.47974 | 4.58942  | 0.18256  | 72 | H | -4.40171 | -3.60311 | 1.60285  |
| 27 | H | -8.31920 | 0.91334  | 1.45694  | 73 | H | -3.07812 | -4.73387 | 1.94318  |
| 28 | H | -6.83366 | -1.04516 | 1.38659  | 74 | O | -3.95153 | -6.76170 | 0.52869  |
| 29 | H | -4.22452 | 1.02039  | -1.32602 | 75 | H | -3.73198 | -7.08406 | 1.41068  |
| 30 | H | -5.70367 | 2.97925  | -1.25578 | 76 | H | 10.04024 | 2.08620  | 0.57901  |
| 31 | H | -9.84669 | 2.15340  | 0.12609  | 77 | O | 9.63350  | 1.24587  | 0.34378  |
| 32 | H | 11.32053 | 4.12494  | 0.21385  | 78 | C | 9.96343  | 0.28175  | 1.35085  |
| 33 | H | 10.34960 | 6.41160  | 0.27310  | 79 | H | 9.64438  | 0.62918  | 2.33993  |
| 34 | H | -7.88135 | 6.69762  | 0.25595  | 80 | H | 11.04587 | 0.10298  | 1.37572  |
| 35 | H | -6.40459 | 4.72721  | 0.19333  | 81 | C | 9.26327  | -1.03387 | 1.05165  |
| 36 | N | -4.63917 | -1.31716 | -0.00373 | 82 | H | 9.64939  | -1.78250 | 1.75115  |

|    |   |          |          |          |    |   |          |          |          |
|----|---|----------|----------|----------|----|---|----------|----------|----------|
| 37 | H | -5.17789 | -2.19169 | -0.02546 | 83 | O | 7.84450  | -0.90861 | 1.25199  |
| 38 | C | 6.27034  | 1.09315  | -0.14614 | 84 | C | 7.12369  | -1.20195 | 0.02934  |
| 39 | C | 5.19583  | 1.92737  | -0.31125 | 85 | H | 6.71323  | -2.20644 | 0.09140  |
| 40 | C | 3.91129  | 1.41293  | -0.36749 | 86 | C | 9.45686  | -1.54542 | -0.38592 |
| 41 | C | 4.68902  | -0.78646 | -0.07479 | 87 | H | 10.35548 | -1.12556 | -0.84557 |
| 42 | C | 3.01550  | 3.62470  | -0.35710 | 88 | C | 8.17524  | -1.09903 | -1.08292 |
| 43 | C | 4.32950  | 4.12552  | -0.26789 | 89 | H | 8.27993  | -0.06589 | -1.41499 |
| 44 | C | 4.56368  | 5.47667  | -0.05741 | 90 | H | 7.92226  | -1.72490 | -1.94021 |
| 45 | H | 5.58976  | 5.82034  | 0.00558  | 91 | O | 9.56372  | -2.97776 | -0.31140 |
| 46 | C | 3.49191  | 6.36619  | 0.06327  | 92 | H | 9.62491  | -3.32309 | -1.20944 |

**dtC<sup>O</sup>:dG (S<sub>0</sub>)**

|    |   | X        | Y        | Z        |    |   | X        | Y        | Z        |
|----|---|----------|----------|----------|----|---|----------|----------|----------|
| 1  | C | -3.19949 | 0.99937  | 0.09301  | 36 | H | -9.08401 | 2.02025  | -0.32609 |
| 2  | C | -3.74933 | -0.28478 | 0.09892  | 37 | O | -8.63255 | 1.19233  | -0.13120 |
| 3  | C | -1.78667 | -1.34267 | 0.09397  | 38 | C | -9.04520 | 0.20948  | -1.08793 |
| 4  | C | -1.78335 | 1.12381  | 0.09192  | 39 | H | -8.80803 | 0.53583  | -2.10652 |
| 5  | C | -5.31668 | 1.27814  | 0.09515  | 40 | H | 10.12525 | 0.03026  | -1.02042 |
| 6  | H | -0.11157 | -0.10502 | 0.08961  | 41 | C | -8.32292 | -1.10018 | -0.82029 |
| 7  | O | -1.10414 | 2.16785  | 0.09073  | 42 | H | -8.73541 | -1.85651 | -1.49347 |
| 8  | N | -4.20009 | 1.95957  | 0.08689  | 43 | O | -6.91253 | -0.97114 | -1.10982 |
| 9  | N | -5.11096 | -0.09433 | 0.10890  | 44 | C | -6.13274 | -1.12780 | 0.07682  |
| 10 | N | -3.10715 | -1.46660 | 0.10052  | 45 | H | -5.59763 | -2.07818 | 0.04077  |
| 11 | N | -1.14783 | -0.12382 | 0.09219  | 46 | C | -8.41097 | -1.60205 | 0.62755  |
| 12 | N | -1.00324 | -2.43648 | 0.08897  | 47 | H | -9.30277 | -1.22290 | 1.13322  |
| 13 | H | 0.01908  | -2.38306 | 0.08507  | 48 | C | -7.11980 | -1.07257 | 1.24889  |
| 14 | H | -1.45582 | -3.33585 | 0.09252  | 49 | H | -7.26709 | -0.04172 | 1.57018  |
| 15 | C | 4.51589  | 0.06413  | -0.01137 | 50 | H | -6.78191 | -1.66673 | 2.09823  |
| 16 | C | 3.82636  | 1.22456  | -0.00872 | 51 | O | -8.43701 | -3.03572 | 0.57298  |
| 17 | C | 2.39787  | 1.15049  | 0.03798  | 52 | H | -8.44330 | -3.37521 | 1.47546  |
| 18 | C | 2.45044  | -1.19350 | 0.05839  | 53 | H | 8.32936  | -0.04968 | -0.27435 |
| 19 | C | 2.33238  | 3.54097  | 0.01550  | 54 | O | 7.65712  | -0.73815 | -0.31399 |
| 20 | C | 3.73191  | 3.58902  | -0.02875 | 55 | C | 7.94694  | -1.72441 | 0.68445  |
| 21 | C | 4.40000  | 4.80292  | -0.05970 | 56 | H | 7.95457  | -1.27379 | 1.68286  |
| 22 | H | 5.48264  | 4.80308  | -0.09312 | 57 | H | 8.92350  | -2.18839 | 0.50173  |
| 23 | C | 3.66912  | 5.99314  | -0.04743 | 58 | C | 6.88286  | -2.80696 | 0.64762  |
| 24 | C | 2.27658  | 5.95671  | -0.00429 | 59 | H | 7.17552  | -3.59418 | 1.34752  |
| 25 | C | 1.60873  | 4.73235  | 0.02731  | 60 | O | 5.61049  | -2.27300 | 1.08239  |
| 26 | H | 5.59771  | 0.02107  | -0.03171 | 61 | C | 4.63644  | -2.37906 | 0.04623  |
| 27 | H | 0.65663  | 2.24396  | 0.07284  | 62 | H | 3.93279  | -3.17693 | 0.27232  |
| 28 | H | 4.19241  | 6.94113  | -0.07175 | 63 | C | 6.63349  | -3.42588 | -0.73663 |
| 29 | H | 1.70535  | 6.87691  | 0.00525  | 64 | H | 7.50135  | -3.31318 | -1.39127 |
| 30 | H | 0.52621  | 4.68856  | 0.06129  | 65 | C | 5.41731  | -2.65188 | -1.24357 |
| 31 | N | 3.84768  | -1.13920 | 0.02453  | 66 | H | 5.74458  | -1.71462 | -1.69523 |
| 32 | N | 1.76475  | -0.01412 | 0.07185  | 67 | H | 4.82913  | -3.21168 | -1.97099 |

|    |   |         |          |          |    |   |          |          |          |
|----|---|---------|----------|----------|----|---|----------|----------|----------|
| 33 | N | 1.68995 | 2.29422  | 0.04840  | 68 | O | 6.34140  | -4.81455 | -0.52571 |
| 34 | O | 1.86289 | -2.28645 | 0.06886  | 69 | H | 6.14594  | -5.21870 | -1.37899 |
| 35 | O | 4.49278 | 2.43265  | -0.04344 | 70 | H | -6.31859 | 1.68023  | 0.07233  |

**dtC<sup>0</sup>:dG (S<sub>1</sub>)**

|    |   | <b>X</b> | <b>Y</b> | <b>Z</b> |    |   | <b>X</b> | <b>Y</b> | <b>Z</b> |
|----|---|----------|----------|----------|----|---|----------|----------|----------|
| 1  | C | 3.19655  | 1.00944  | -0.10587 | 36 | H | 9.08045  | 2.00748  | 0.37694  |
| 2  | C | 3.74232  | -0.27645 | -0.11756 | 37 | O | 8.62809  | 1.18260  | 0.17155  |
| 3  | C | 1.77455  | -1.32505 | -0.13506 | 38 | C | 9.02651  | 0.19181  | 1.12618  |
| 4  | C | 1.78085  | 1.13726  | -0.11301 | 39 | H | 8.77863  | 0.51194  | 2.14419  |
| 5  | C | 5.31476  | 1.28129  | -0.08968 | 40 | H | 10.10670 | 0.00957  | 1.06986  |
| 6  | H | 0.09612  | -0.08539 | -0.13034 | 41 | C | 8.30321  | -1.11368 | 0.84120  |
| 7  | O | 1.10821  | 2.18747  | -0.10689 | 42 | H | 8.70610  | -1.87610 | 1.51332  |
| 8  | N | 4.20021  | 1.96634  | -0.08461 | 43 | O | 6.89016  | -0.98262 | 1.11611  |
| 9  | N | 5.10499  | -0.09031 | -0.11577 | 44 | C | 6.12296  | -1.12715 | -0.08051 |
| 10 | N | 3.09560  | -1.45503 | -0.13304 | 45 | H | 5.58445  | -2.07603 | -0.05775 |
| 11 | N | 1.13925  | -0.10497 | -0.12813 | 46 | C | 8.40564  | -1.60522 | -0.60924 |
| 12 | N | 0.98868  | -2.41722 | -0.14576 | 47 | H | 9.30442  | -1.22570 | -1.10211 |
| 13 | H | -0.03558 | -2.36567 | -0.14339 | 48 | C | 7.12341  | -1.06631 | -1.24090 |
| 14 | H | 1.44160  | -3.31649 | -0.14792 | 49 | H | 7.27796  | -0.03352 | -1.55240 |
| 15 | C | -4.53331 | 0.06732  | 0.01680  | 50 | H | 6.79310  | -1.65263 | -2.09862 |
| 16 | C | -3.79126 | 1.22299  | -0.00043 | 51 | O | 8.42579  | -3.03934 | -0.56488 |
| 17 | C | -2.39742 | 1.16002  | -0.06630 | 52 | H | 8.44053  | -3.37235 | -1.46966 |
| 18 | C | -2.40883 | -1.17538 | -0.09469 | 53 | H | -8.35812 | -0.08488 | 0.21638  |
| 19 | C | -2.29211 | 3.53624  | -0.01782 | 54 | O | -7.67573 | -0.76138 | 0.28041  |
| 20 | C | -3.73479 | 3.56556  | 0.03036  | 55 | C | -7.93929 | -1.77539 | -0.69744 |
| 21 | C | -4.43095 | 4.77178  | 0.07549  | 56 | H | -7.94256 | -1.34843 | -1.70633 |
| 22 | H | -5.51279 | 4.74279  | 0.11136  | 57 | H | -8.91140 | -2.24869 | -0.51399 |
| 23 | C | -3.73150 | 5.96617  | 0.07354  | 58 | C | -6.86081 | -2.84260 | -0.62538 |
| 24 | C | -2.31359 | 5.95659  | 0.02833  | 59 | H | -7.14293 | -3.65262 | -1.30394 |
| 25 | C | -1.60668 | 4.77632  | -0.01569 | 60 | O | -5.59355 | -2.30888 | -1.06746 |
| 26 | H | -5.61453 | 0.04165  | 0.03423  | 61 | C | -4.61920 | -2.36705 | -0.01695 |
| 27 | H | -0.62200 | 2.29448  | -0.08676 | 62 | H | -3.90868 | -3.16605 | -0.21297 |
| 28 | H | -4.26552 | 6.90685  | 0.10707  | 63 | C | -6.61486 | -3.42032 | 0.77715  |
| 29 | H | -1.77667 | 6.89737  | 0.02831  | 64 | H | -7.49030 | -3.30324 | 1.42141  |
| 30 | H | -0.52412 | 4.76856  | -0.05008 | 65 | C | -5.41438 | -2.61663 | 1.27288  |
| 31 | N | -3.85062 | -1.12701 | -0.02324 | 66 | H | -5.75670 | -1.67145 | 1.69598  |
| 32 | N | -1.72507 | -0.02772 | -0.11407 | 67 | H | -4.82533 | -3.14988 | 2.01958  |
| 33 | N | -1.65838 | 2.35044  | -0.06365 | 68 | O | -6.30234 | -4.81072 | 0.60669  |
| 34 | O | -1.86927 | -2.29777 | -0.12700 | 69 | H | -6.09875 | -5.18582 | 1.47123  |
| 35 | O | -4.46322 | 2.41860  | 0.03994  | 70 | H | 6.31767  | 1.68011  | -0.05578 |



**Fig. S11.** FMOs involved in the absorption and emission processes of dtC<sup>O</sup> (upper panel), dtC<sup>O</sup>:<sup>ABP</sup>dG (middle panel), dtC<sup>O</sup>:dG (lower panel).

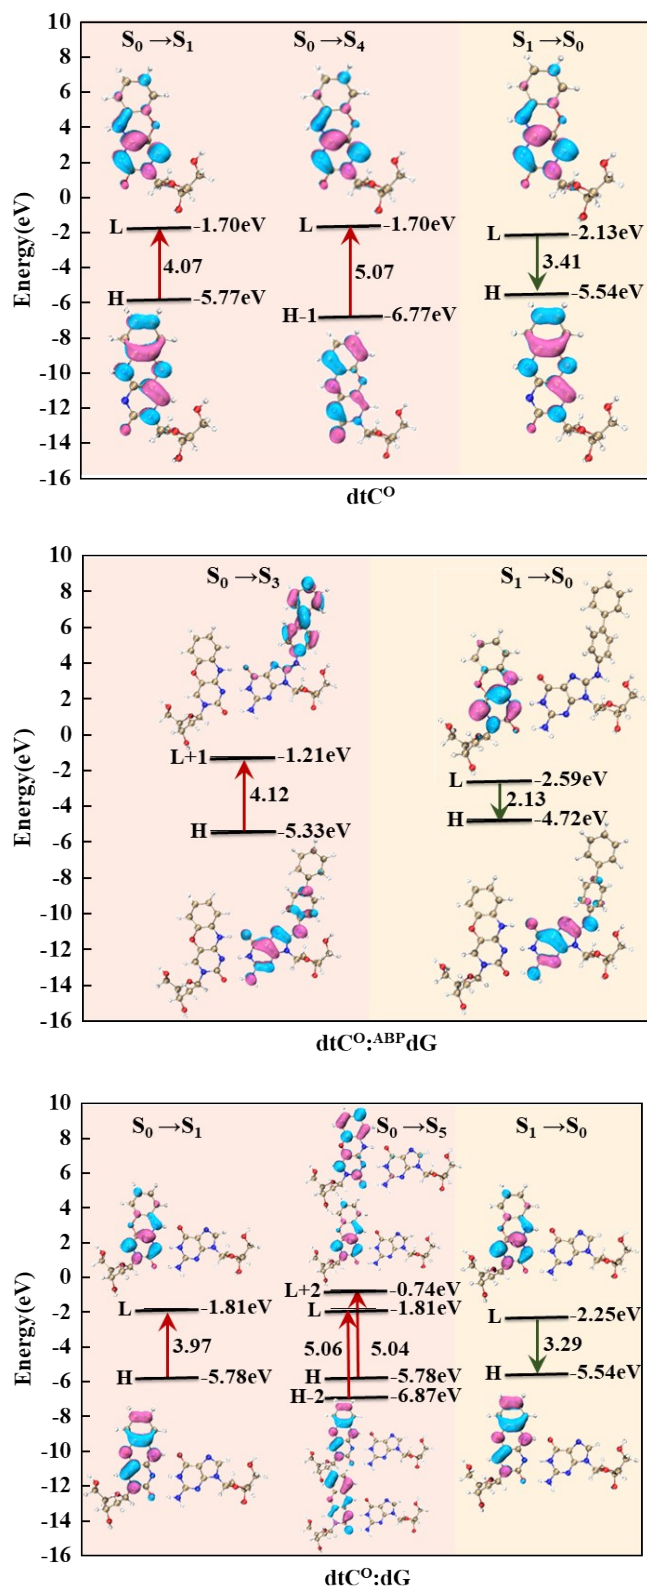

**Table S8.** Absorption/fluorescence wavelengths ( $\lambda$ ), corresponding oscillator strengths ( $f_{\text{abs.}}$  and  $f_{\text{flu.}}$ ), and state assignments for dtC<sup>O</sup>, dtC<sup>O</sup>:ABP dG, dtC<sup>O</sup>:dG.

| Optical spectral | Monomer/<br>Base pair    | Transition                     | $\lambda$ (nm) | $f_{\text{abs.}}/f_{\text{flu.}}$ | Assignment(CI/Type/Gap(eV))                    |
|------------------|--------------------------|--------------------------------|----------------|-----------------------------------|------------------------------------------------|
| Absorption       | dtC <sup>O</sup>         | S <sub>0</sub> →S <sub>1</sub> | 358            | 0.20                              | H→L(97.2%/ππ*/4.07)                            |
|                  |                          | S <sub>0</sub> →S <sub>4</sub> | 271            | 0.34                              | H-1→L(70.7%/ππ*/5.07)                          |
|                  | dtC <sup>O</sup> :ABP dG | S <sub>0</sub> →S <sub>3</sub> | 340            | 0.71                              | H→L+1(98.1%/ππ*/4.12)                          |
|                  | dtC <sup>O</sup> :dG     | S <sub>0</sub> →S <sub>1</sub> | 366            | 0.21                              | H→L(96.9%/ππ*/3.97)                            |
|                  |                          | S <sub>0</sub> →S <sub>5</sub> | 290            | 0.04                              | H→L+2(19.6%/ππ*/5.04)<br>H-2→L(63.2%/ππ*/5.06) |
| Fluorescence     | dtC <sup>O</sup>         | S <sub>1</sub> →S <sub>0</sub> | 449            | 0.29                              | L→H(98.9%/ππ*/3.41)                            |
|                  | dtC <sup>O</sup> :ABP dG | S <sub>1</sub> →S <sub>0</sub> | 726            | 0                                 | L→H(99.8%/ππ*/2.13)                            |
|                  | dtC <sup>O</sup> :dG     | S <sub>1</sub> →S <sub>0</sub> | 464            | 0.32                              | L→H(99.0%/ππ*/3.29)                            |
